# Supplementary material
Source: publisher figshare collection journal article supplement (https://plos.figshare.com/articles/dataset/_/6283679)
Supplement: Supplementary file [file 1]

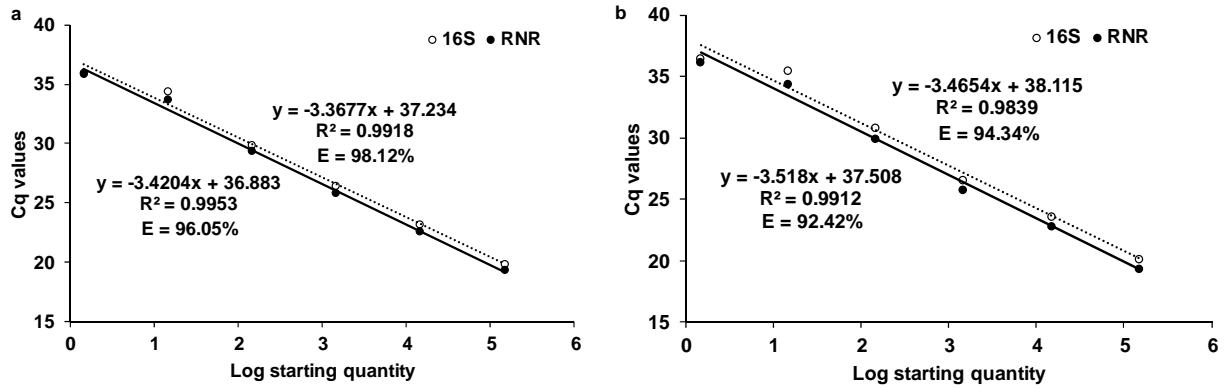

**Fig S2. Calibration curve of CLas qPCR (a) singleplex and (b) duplex assays with tenfold serially diluted 16S and RNR Plasmid DNA ( $1.48E+05$  to  $1.48E+00$  copies/ $\mu$ l and  $1.47E+05$  to  $1.47E+00$  copies/ $\mu$ l, respectively) using 16S (broken line) and RNR (unbroken line) primers at 150:300 nm primer:probe ratio.**
