# Supplementary material
Source: publisher figshare collection journal article supplement (https://plos.figshare.com/articles/dataset/_/6283679)
Supplement: Supplementary file [file 1]

**S3 Table. Quantitative data of CLas plasmid DNA with 16S and RNR primers in ddPCR assay**

| 16S                                        |                 |                             |                           |                 |                             |                           | RNR                                        |                 |                             |                           |                 |                             |                           |
|--------------------------------------------|-----------------|-----------------------------|---------------------------|-----------------|-----------------------------|---------------------------|--------------------------------------------|-----------------|-----------------------------|---------------------------|-----------------|-----------------------------|---------------------------|
| Calculated<br>copies/ $\mu$ l <sup>a</sup> | Singleplex      |                             |                           | Duplex          |                             |                           | Calculated<br>copies/ $\mu$ l <sup>a</sup> | Singleplex      |                             |                           | Duplex          |                             |                           |
|                                            | Mean            | Poisson<br>SEM <sup>b</sup> | Total<br>SEM <sup>b</sup> | Mean            | Poisson<br>SEM <sup>b</sup> | Total<br>SEM <sup>b</sup> |                                            | Mean            | Poisson<br>SEM <sup>b</sup> | Total<br>SEM <sup>b</sup> | Mean            | Poisson<br>SEM <sup>b</sup> | Total<br>SEM <sup>b</sup> |
| 1.48E+05                                   | NA <sup>c</sup> | NA <sup>c</sup>             | NA <sup>c</sup>           | NA <sup>c</sup> | NA <sup>c</sup>             | NA <sup>c</sup>           | 1.47E+05                                   | NA <sup>c</sup> | NA <sup>c</sup>             | NA <sup>c</sup>           | NA <sup>c</sup> | NA <sup>c</sup>             | NA <sup>c</sup>           |
| 1.48E+04                                   | 11380           | 6.06                        | 14.44                     | 10340           | 4.33                        | 10.41                     | 1.47E+04                                   | 11680           | 6.06                        | 6.66                      | 12140           | 4.91                        | 11.27                     |
| 1.48E+03                                   | 1272            | 1.85                        | 3.77                      | 1202            | 1.39                        | 1.39                      | 1.47E+03                                   | 890             | 1.59                        | 1.59                      | 942             | 1.21                        | 1.21                      |
| 1.48E+02                                   | 80              | 0.46                        | 0.46                      | 66              | 0.32                        | 0.32                      | 1.47E+02                                   | 76              | 0.46                        | 0.46                      | 78              | 0.35                        | 0.35                      |
| 1.48E+01                                   | 8.6             | 0.14                        | 0.20                      | 11.8            | 0.14                        | 0.14                      | 1.47E+01                                   | 5.2             | 0.12                        | 0.35                      | 6.2             | 0.10                        | 0.11                      |
| 1.48E+00                                   | 2.4             | 0.11                        | 0.11                      | 2.2             | 0.06                        | 0.06                      | 1.47E+00                                   | 2               | 0.07                        | 0.07                      | 3               | 0.07                        | 0.07                      |
| NTC <sup>d</sup>                           | 0               | 0                           | 0                         | 0               | 0                           | 0                         |                                            | 0               | 0                           | 0                         | 0               | 0                           | 0                         |

<sup>a</sup> Values reflect copies/20  $\mu$ l ddPCR reaction. Data represents the ddPCR values from merged triplicates of each dilutions.

<sup>b</sup> SEM means standard error of mean.

<sup>c</sup> NA means not applicable.

<sup>d</sup> NTC means no template control.
