# Supplementary material
Source: publisher figshare collection journal article supplement (https://plos.figshare.com/articles/dataset/_/6283679)
Supplement: Supplementary file [file 1]

**S4 Table. Quantitative data of CLas infected leaf DNA with 16S primer in qPCR and ddPCR singleplex and duplex assays**

| DNA concentration <sup>a</sup> | Singleplex |                 |                   |                          |                        | Duplex  |                 |                   |                          |                        |
|--------------------------------|------------|-----------------|-------------------|--------------------------|------------------------|---------|-----------------|-------------------|--------------------------|------------------------|
|                                | qPCR       |                 | ddPCR             |                          |                        | qPCR    |                 | ddPCR             |                          |                        |
|                                | Mean Cq    | SD <sup>b</sup> | Mean <sup>c</sup> | Poisson SEM <sup>d</sup> | Total SEM <sup>d</sup> | Mean Cq | SD <sup>b</sup> | Mean <sup>c</sup> | Poisson SEM <sup>d</sup> | Total SEM <sup>d</sup> |
| 20 ng                          | 19.99      | 0.091           | NA <sup>e</sup>   | NA <sup>e</sup>          | NA <sup>e</sup>        | 20.05   | 0.040           | NA <sup>e</sup>   | NA <sup>e</sup>          | NA <sup>e</sup>        |
| 2 ng                           | 22.74      | 0.076           | 10860             | 4.33                     | 6.64                   | 23.24   | 0.035           | 10120             | 4.33                     | 17.32                  |
| 0.2 ng                         | 25.73      | 0.145           | 1174              | 1.30                     | 1.39                   | 26.20   | 0.020           | 1046              | 1.18                     | 1.18                   |
| 0.02 ng                        | 28.88      | 0.300           | 136               | 0.43                     | 0.43                   | 29.40   | 0.320           | 118               | 0.38                     | 0.38                   |
| 0.002 ng                       | 33.00      | 0.105           | 13                | 0.13                     | 0.13                   | 33.43   | 0.590           | 11.4              | 0.12                     | 0.12                   |
| 0.0002 ng                      | 36.87      | 0.461           | 2                 | 0.07                     | 0.07                   | 36.55   | 0.297           | 2.4               | 0.06                     | 0.06                   |
| Healthy                        | 0          | 0               | 0                 | 0                        | 0                      | 0       | 0               | 0                 | 0                        | 0                      |

<sup>a</sup> Values reflect concentration of DNA used for serial dilution.

<sup>b</sup> SD means standard deviation.

<sup>c</sup> Values reflect copies/20 µl ddPCR reaction. Data represents the ddPCR values from merged triplicates of each dilutions.

<sup>d</sup> SEM means standard error of mean.

<sup>e</sup> NA means not applicable.
