# Supplementary material
Source: publisher figshare collection journal article supplement (https://plos.figshare.com/articles/dataset/_/6283679)
Supplement: Supplementary file [file 1]

**S6 Table. Quantitative data of CLas-infected insect DNA with 16S primer in qPCR and ddPCR singleplex and duplex assays**

| DNA concentration <sup>a</sup> | Singleplex          |                 |                   |                          |                        | Duplex              |                 |                   |                          |                        |
|--------------------------------|---------------------|-----------------|-------------------|--------------------------|------------------------|---------------------|-----------------|-------------------|--------------------------|------------------------|
|                                | qPCR                |                 | ddPCR             |                          |                        | qPCR                |                 | ddPCR             |                          |                        |
|                                | Mean C <sub>q</sub> | SD <sup>b</sup> | Mean <sup>c</sup> | Poisson SEM <sup>d</sup> | Total SEM <sup>d</sup> | Mean C <sub>q</sub> | SD <sup>b</sup> | Mean <sup>c</sup> | Poisson SEM <sup>d</sup> | Total SEM <sup>d</sup> |
| 10 ng                          | 20.13               | 0.044           | NA <sup>e</sup>   | NA <sup>e</sup>          | NA <sup>e</sup>        | 20.34               | 0.017           | NA <sup>e</sup>   | NA <sup>e</sup>          | NA <sup>e</sup>        |
| 1 ng                           | 23.80               | 0.155           | 15380             | 6.93                     | 6.93                   | 23.65               | 0.335           | 15120             | 6.64                     | 6.64                   |
| 0.1 ng                         | 27.34               | 0.160           | 1676              | 2.08                     | 4.33                   | 27.26               | 0.127           | 1488              | 1.76                     | 1.76                   |
| 0.01 ng                        | 32.60               | 0.359           | 196               | 0.69                     | 0.87                   | 31.62               | 0.071           | 150               | 0.55                     | 0.55                   |
| 0.001 ng                       | 33.87               | 0.310           | 16.2              | 0.20                     | 0.21                   | 33.56               | 0.341           | 12.6              | 0.17                     | 0.24                   |
| 0.0001 ng                      | 36.22               | 0.523           | 2.2               | 0.10                     | 0.10                   | 36.63               | 0.070           | 4                 | 0.12                     | 0.13                   |
| Healthy                        | 0                   | 0               | 0                 | 0                        | 0                      | 0                   | 0               | 0                 | 0                        | 0                      |

<sup>a</sup> Values reflect concentration of DNA used for serial dilution.<sup>b</sup> SD means standard deviation.<sup>c</sup> Values reflect copies/20 µl ddPCR reaction. Data represents the ddPCR values from merged triplicates of each dilutions.<sup>d</sup> SEM means standard error of mean.<sup>e</sup> NA means not applicable.
