# Supplementary material
Source: publisher figshare collection journal article supplement (https://plos.figshare.com/articles/dataset/_/6283679)
Supplement: Supplementary file [file 1]

**S1 Table. Quantitative data of CLas plasmid DNA with 16S primer in qPCR assay**

| Calculated<br>copies/ $\mu$ l <sup>a</sup> | Log<br>SQ <sup>b</sup> | Primer/Probe concentration |                 |            |                 |            |                 |            |                 |            |                 |            |                 |
|--------------------------------------------|------------------------|----------------------------|-----------------|------------|-----------------|------------|-----------------|------------|-----------------|------------|-----------------|------------|-----------------|
|                                            |                        | 50/100                     |                 |            |                 | 100/200    |                 |            |                 | 150/300    |                 |            |                 |
|                                            |                        | Singleplex                 |                 | Duplex     |                 | Singleplex |                 | Duplex     |                 | Singleplex |                 | Duplex     |                 |
|                                            |                        | Mean<br>Cq                 | SD <sup>c</sup> | Mean<br>Cq | SD <sup>c</sup> | Mean<br>Cq | SD <sup>c</sup> | Mean<br>Cq | SD <sup>c</sup> | Mean<br>Cq | SD <sup>c</sup> | Mean<br>Cq | SD <sup>c</sup> |
| 1.48E+05                                   | 5.169                  | 19.23                      | 0.090           | 19.28      | 0.095           | 19.81      | 0.075           | 20.01      | 0.111           | 19.79      | 0.025           | 20.16      | 0.023           |
| 1.48E+04                                   | 4.169                  | 22.54                      | 0.197           | 22.74      | 0.235           | 23.15      | 0.146           | 23.24      | 0.147           | 23.11      | 0.042           | 23.67      | 0.044           |
| 1.48E+03                                   | 3.169                  | 25.73                      | 0.175           | 25.86      | 0.121           | 26.40      | 0.112           | 26.40      | 0.153           | 26.42      | 0.044           | 26.57      | 0.471           |
| 1.48E+02                                   | 2.169                  | 29.14                      | 0.300           | 29.09      | 0.136           | 31.05      | 0.526           | 30.64      | 0.265           | 29.88      | 0.14            | 30.83      | 0.276           |
| 1.48E+01                                   | 1.169                  | 33.89                      | 0.729           | 33.57      | 0.700           | 33.10      | 0.485           | 33.20      | 0.140           | 34.33      | 0.124           | 35.47      | 0.375           |
| 1.48E+00                                   | 0.169                  | 35.55                      | 0.840           | 36.72      | 0.163           | 36.45      | 0.352           | 36.55      | 0.092           | 35.94      | 0.313           | 36.49      | 0.417           |
| NTC <sup>d</sup>                           | 0                      | 0                          | 0               | 0          | 0               | 0          | 0               | 0          | 0               | 0          | 0               | 0          | 0               |

<sup>a</sup> Values reflect copies/ $\mu$ l of calculated serial dilutions of positive plasmid DNA standard.

<sup>b</sup> SQ means starting quantity. Data represent the mean of each dilution tested in triplicate.

<sup>c</sup> SD means standard deviation.

<sup>d</sup> NTC means no template control.
