# Supplementary material
Source: publisher figshare collection journal article supplement (https://plos.figshare.com/articles/dataset/_/6283679)
Supplement: Supplementary file [file 1]

**S5 Table. Quantitative data of CLas-infected leaf DNA with RNR primer in qPCR and ddPCR singleplex and duplex assays**

| DNA concentration <sup>a</sup> | Singleplex |                 |                   |                          |                        | Duplex  |                 |                   |                          |                        |
|--------------------------------|------------|-----------------|-------------------|--------------------------|------------------------|---------|-----------------|-------------------|--------------------------|------------------------|
|                                | qPCR       |                 | ddPCR             |                          |                        | qPCR    |                 | ddPCR             |                          |                        |
|                                | Mean Cq    | SD <sup>b</sup> | Mean <sup>c</sup> | Poisson SEM <sup>d</sup> | Total SEM <sup>d</sup> | Mean Cq | SD <sup>b</sup> | Mean <sup>c</sup> | Poisson SEM <sup>d</sup> | Total SEM <sup>d</sup> |
| 20 ng                          | 19.47      | 0.090           | NA <sup>e</sup>   | NA <sup>e</sup>          | NA <sup>e</sup>        | 19.20   | 0.012           | NA <sup>e</sup>   | NA <sup>e</sup>          | NA <sup>e</sup>        |
| 2 ng                           | 22.19      | 0.106           | 19440             | 8.66                     | 15.89                  | 22.19   | 0.101           | 18520             | 6.06                     | 25.12                  |
| 0.2 ng                         | 25.25      | 0.081           | 1564              | 1.99                     | 2.25                   | 25.30   | 0.029           | 1454              | 1.41                     | 2.05                   |
| 0.02 ng                        | 28.60      | 0.142           | 184               | 0.64                     | 0.64                   | 28.70   | 0.165           | 190               | 0.49                     | 0.49                   |
| 0.002 ng                       | 32.54      | 0.356           | 22.6              | 0.21                     | 0.43                   | 32.92   | 0.320           | 19.4              | 0.16                     | 0.16                   |
| 0.0002 ng                      | 36.69      | 0.706           | 2                 | 0.07                     | 0.07                   | 36.00   | 0.471           | 2                 | 0.05                     | 0.06                   |
| Healthy                        | 0          | 0               | 0                 | 0                        | 0                      | 0       | 0               | 0                 | 0                        | 0                      |

<sup>a</sup> Values reflect concentration of DNA used for serial dilution.

<sup>b</sup> SD means standard deviation.

<sup>c</sup> Values reflect copies/20 µl ddPCR reaction. Data represents the ddPCR values from merged triplicates of each dilutions.

<sup>d</sup> SEM means standard error of mean.

<sup>e</sup> NA means not applicable.
