# Supplementary material
Source: publisher figshare collection journal article supplement (https://plos.figshare.com/articles/dataset/_/6283679)
Supplement: Supplementary file [file 1]

**S2 Table. Quantitative data of CLas plasmid DNA with RNR primer in qPCR assay**

| Calculated<br>copies/ $\mu$ l <sup>a</sup> | Log<br>SQ <sup>b</sup> | Primer/Probe concentration |                 |            |                 |            |                 |            |                 |            |                 |            |                 |
|--------------------------------------------|------------------------|----------------------------|-----------------|------------|-----------------|------------|-----------------|------------|-----------------|------------|-----------------|------------|-----------------|
|                                            |                        | 50/100                     |                 |            |                 | 100/200    |                 |            |                 | 150/300    |                 |            |                 |
|                                            |                        | Singleplex                 |                 | Duplex     |                 | Singleplex |                 | Duplex     |                 | Singleplex |                 | Duplex     |                 |
|                                            |                        | Mean<br>Cq                 | SD <sup>c</sup> | Mean<br>Cq | SD <sup>c</sup> | Mean<br>Cq | SD <sup>c</sup> | Mean<br>Cq | SD <sup>c</sup> | Mean<br>Cq | SD <sup>c</sup> | Mean<br>Cq | SD <sup>c</sup> |
| 1.47E+05                                   | 5. 168                 | 18.76                      | 0.136           | 19.03      | 0.153           | 19.39      | 0.123           | 19.41      | 0.097           | 19.32      | 0.095           | 19.41      | 0.021           |
| 1.47E+04                                   | 4. 168                 | 22.10                      | 0.040           | 22.12      | 0.150           | 22.69      | 0.358           | 22.54      | 0.238           | 22.51      | 0.087           | 22.82      | 0.104           |
| 1.47E+03                                   | 3. 168                 | 25.62                      | 0.237           | 25.56      | 0.059           | 26.28      | 0.097           | 25.83      | 0.087           | 25.83      | 0.067           | 25.81      | 0.469           |
| 1.47E+02                                   | 2. 168                 | 29.08                      | 0.139           | 28.72      | 0.265           | 30.64      | 0.295           | 29.92      | 0.271           | 29.34      | 0.129           | 30.02      | 0.265           |
| 1.47E+01                                   | 1. 168                 | 34.17                      | 0.811           | 33.57      | 0.962           | 33.43      | 0.292           | 33.20      | 0.170           | 33.70      | 0.286           | 34.45      | 0.256           |
| 1.47E+00                                   | 0. 168                 | 36.05                      | 0.021           | 36.16      | 0.035           | 36.17      | 0.395           | 35.62      | 0.358           | 35.84      | 0.516           | 36.22      | 0.679           |
| NTC <sup>d</sup>                           | 0                      | 0                          | 0               | 0          | 0               | 0          | 0               | 0          | 0               | 0          | 0               | 0          | 0               |

<sup>a</sup> Values reflect copies/ $\mu$ l of calculated serial dilutions of positive plasmid DNA standard.

<sup>b</sup> SQ means starting quantity. Data represent the mean of each dilution tested in triplicate.

<sup>c</sup> SD means standard deviation.

<sup>d</sup> NTC means no template control.
