# Supplementary material
Source: publisher figshare collection journal article supplement (https://plos.figshare.com/articles/dataset/_/6283679)
Supplement: Supplementary file [file 1]

**S7 Table. Quantitative data of CLas-infected insect DNA with RNR primer in qPCR and ddPCR singleplex and duplex assays**

| DNA concentration <sup>a</sup> | Singleplex |                 |                   |                          |                        | Duplex  |                 |                   |                          |                        |
|--------------------------------|------------|-----------------|-------------------|--------------------------|------------------------|---------|-----------------|-------------------|--------------------------|------------------------|
|                                | qPCR       |                 | ddPCR             |                          |                        | qPCR    |                 | ddPCR             |                          |                        |
|                                | Mean Cq    | SD <sup>b</sup> | Mean <sup>c</sup> | Poisson SEM <sup>d</sup> | Total SEM <sup>d</sup> | Mean Cq | SD <sup>b</sup> | Mean <sup>c</sup> | Poisson SEM <sup>d</sup> | Total SEM <sup>d</sup> |
| 10 ng                          | 19.28      | 0.087           | NA <sup>e</sup>   | NA <sup>e</sup>          | NA <sup>e</sup>        | 19.50   | 0.040           | NA <sup>e</sup>   | NA <sup>e</sup>          | NA <sup>e</sup>        |
| 1 ng                           | 22.47      | 0.105           | 22800             | 8.95                     | 13.28                  | 22.64   | 0.342           | 23580             | 9.24                     | 9.53                   |
| 0.1 ng                         | 26.33      | 0.117           | 2416              | 2.42                     | 2.74                   | 26.52   | 0.116           | 2276              | 2.19                     | 2.19                   |
| 0.01 ng                        | 31.04      | 0.234           | 238               | 0.75                     | 0.81                   | 30.35   | 0.429           | 224               | 0.66                     | 0.66                   |
| 0.001 ng                       | 33.48      | 0.320           | 34.4              | 0.27                     | 0.40                   | 33.42   | 0.780           | 24.4              | 0.24                     | 0.24                   |
| 0.0001 ng                      | 36.57      | 0.200           | 3.2               | 0.09                     | 0.09                   | 35.94   | 0.739           | 4                 | 0.12                     | 0.13                   |
| Healthy                        | 0          | 0               | 0                 | 0                        | 0                      | 0       | 0               | 0                 | 0                        | 0                      |

<sup>a</sup> Values reflect concentration of DNA used for serial dilution.

<sup>b</sup> SD means standard deviation.

<sup>c</sup> Values reflect copies/20 µl ddPCR reaction. Data represents the ddPCR values from merged triplicates of each dilutions.

<sup>d</sup> SEM means standard error of mean.

<sup>e</sup> NA means not applicable.
